# Supplementary material for: Mutation of a PER2 phosphodegron perturbs the circadian phosphoswitch
Source: PubMed Central journal article supplement — Proc Natl Acad Sci U S A. 2020 Apr 30;117(20):10888–96. doi: 10.1073/pnas.2000266117 (PMC7245125; doi:10.1073/pnas.2000266117), 2020-04-30
Supplement: pnas.2000266117.sapp.pdf [file pnas.2000266117.sapp.pdf]

# PNAS

[www.pnas.org](http://www.pnas.org)

Supplementary Information for

Mutation of a PER2 phosphodegron perturbs the circadian phosphoswitch

Shusaku Masuda<sup>1</sup>, Rajesh Narasimamurthy<sup>2</sup>, Hikari Yoshitane<sup>1</sup>,  
Jae Kyoung Kim<sup>3</sup>, Yoshitaka Fukada<sup>1,\*</sup>, and David M. Virshup<sup>2,4,\*</sup>

<sup>1</sup> Department of Biological Sciences, School of Science, The University of Tokyo, Hongo 7-3-1, Bunkyo-ku, Tokyo 113-0033, Japan.

<sup>2</sup> Programme in Cancer and Stem Cell Biology, Duke-NUS Medical School, 169857 Singapore

<sup>3</sup> Department of Mathematical Sciences, Korea Advanced Institute of Science and Technology, Daejeon 305-701, Korea

<sup>4</sup> Department of Pediatrics, Duke University Medical Center, Durham, NC 27710, United States

Dr. David M. Virshup

E-mail: [david.virshup@duke-nus.edu.sg](mailto:david.virshup@duke-nus.edu.sg)

Dr. Yoshitaka Fukada

E-mail: [sfukada@mail.ecc.u-tokyo.ac.jp](mailto:sfukada@mail.ecc.u-tokyo.ac.jp)

**This PDF file includes:**

Figures S1 and S2

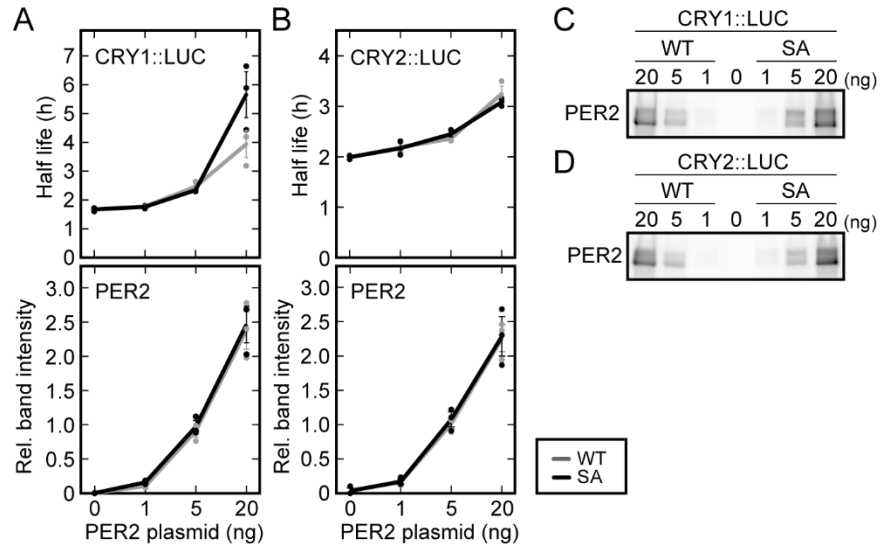

**Fig. S1.** PER2 stabilizes CRY1::LUC and CRY2::LUC

(A, B) Half-lives of the bioluminescence derived from CRY1::LUC (A, upper panel) or CRY2::LUC (B, upper panel) after CHX treatment. The detailed method for calculation of half-lives is described in Materials and methods. Myc-PER2 (WT) or Myc-PER2-S478A (SA) were co-transfected with CRY1::LUC or CRY2::LUC. The abundance of PER2 proteins were analyzed by immunoblotting with anti-PER2 antibody (A, B, lower panel). Mean values  $\pm$  SEM obtained from three biological replicates are given.

(C) Representative western blot for PER2, corresponding to (A, lower panel).

(D) Representative western blot for PER2, corresponding to (B, lower panel).

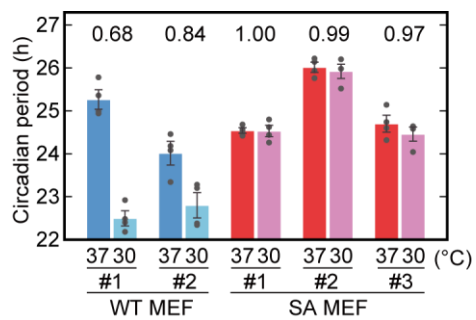

**Fig. S2.** Temperature compensation of the period is compromised by the PER2-S478A mutation. The circadian period of cellular rhythms was calculated. Mean values  $\pm$  SEM obtained from PER2::LUC MEFs (WT) and PER2-S478A::LUC (SA) MEFs are given ( $n = 4$ ).  $Q_{10}$  values were shown above the bars.
